# Supplementary material for: Comprehensive itaconic acid-based vitrimers via one-pot inverse vulcanization
Source: Royal Society of Chemistry journal article supplement (doi:10.1039/d3gc00899a), 2023-01-01
Supplement: d3gc00899a2.pdf [file d3gc00899a2.pdf]

## Supplementary Information

### Comprehensive itaconic acid-based vitrimers via one-pot inverse vulcanization

*Zhongkai Guo,<sup>a</sup> Xuwei Jiao,<sup>a</sup> Kailun Wei,<sup>a</sup> Jianqiao Wu<sup>\*b</sup> and Jun Hu<sup>\*a</sup>*

<sup>a</sup>Beijing Advanced Innovation Center for Soft Matter Science and Engineering, Beijing University of Chemical Technology, North Third Ring Road 15, Chaoyang District, Beijing 100029, China.

<sup>b</sup>College of Materials and Chemical Engineering, Chuzhou University, Chuzhou, Anhui Province, 239000, China.

#### **\*Corresponding Authors**

Email: [jhu@mail.buct.edu.cn](mailto:jhu@mail.buct.edu.cn) (Jun Hu), [wujianqiao1012@163.com](mailto:wujianqiao1012@163.com) (Jianqiao Wu).

The supporting information includes 11 pages, 3 tables and 9 figures.

## Contents

|                                |     |
|--------------------------------|-----|
| 1. Characterization .....      | S3  |
| 2. Supplementray Figures ..... | S5  |
| Figure S1.....                 | S5  |
| Fgiure S2.....                 | S5  |
| Figure S3.....                 | S6  |
| Figure S4.....                 | S6  |
| Figure S5.....                 | S7  |
| Figure S6.....                 | S7  |
| Figure S7.....                 | S7  |
| Figure S8.....                 | S8  |
| Figure S9.....                 | S8  |
| 3. Supplementray Tables.....   | S9  |
| Table S1.....                  | S9  |
| Table S2.....                  | S10 |
| Table S3.....                  | S11 |

## 1. Characterization

*Differential scanning calorimeter (DSC):* DSC test was carried out using TADSC 250 with nitrogen purge of 50 mL.min<sup>-1</sup>, temperature range from -40°C to 180°C, and heating rate of 10°C min<sup>-1</sup>. The samples were approximately 5 mg and sealed in aluminum sample crucibles.

*Thermogravimetric analysis (TGA):* The thermal stability was measured by using a thermogravimetric analyzer (TGA, TA-Q50) under nitrogen from room temperature to 800°C at a heating rate of 10°C min<sup>-1</sup>.

*X-Ray diffraction (XRD):* XRD measurements were conducted on a Bruker D8 ADVANCE instrument using Cu K $\alpha$  radiation ( $\lambda=1.54178$  Å). The scanning was performed on a diffraction range ( $2\theta$ ) of 5-80° with a scanning speed of 10° min<sup>-1</sup>.

*Fourier transform infrared spectroscopy (FTIR):* FTIR spectra were recorded on a spectrophotometer (Nicolet iS5). All samples were scanned from 4000 to 500 cm<sup>-1</sup>.

*Tensile test:* Tensile stress-strain curves were obtained by using a universal testing machine (ETM504C, Hubei Wance Test Machine Co. Ltd., China) according to ASTM D882 standard. Dog-bone samples were used for the test. The crosshead speed was 10 mm per min, and the gauge length was 17  $\pm$  2 mm. The average values with error bar of all mechanical data were obtained after 5 times tests for every sample.

*Hardness:* Hardness measurements were performed on a D type Digital Shore Durometer. Same thickness of 1mm was applied to all the samples, and 7 times tests for each sample were conducted.

*Dynamic mechanical analysis (DMA):* Dynamic mechanical properties were measured by using a dynamic mechanical analyzer (DMA, TA-Q800) in tension mode. The sample with a dimension of 30 mm  $\times$  5 mm  $\times$  1 mm was scanned from -50 to 80°C at a heating rate of 5°C/min. The amplitude was set at 10  $\mu$ m and the frequency was 1 Hz.

*Stress relaxation test:* Stress relaxation was measured by using DMA (TA-Q800). The sample dimension was 30 mm  $\times$  5 mm  $\times$  1 mm. The sample was heated to the appointed temperature and soaked for 10 min with a static force (0.001 N). After that, an instantaneous strain of 2% was forced to the material. The stress and modulus were detected until it achieved equilibrium.

*Physical recycling:* The sample pieces were gathered and put into a mold on a press vulcanizer at 140°C at 20 tons pressure to form a new film. The new film was used to prepare dumbbell-shaped samples with similar size to original ones for the tensile test.

*Welding test:* Two pieces were assembled into an “L” pattern, and then welded in an oven at 140°C for 1 h. A slight weight was applied on the sample to offer a pressure.

*Repairing test:* The sample was cracked using a knife and repaired at an oven at 140°C. A glass slide was added on the sample to offer a small pressure. The repairing process was monitored by using an optical microscope (UPT200I).

*Chemical degradation:* The rectangular sample of 30 mg was immersed in ethylene glycol/dimethylformamide (EG/DMF, 0.1 g/mL, 2 mL), dithiothreitol/dimethylformamide (DTT/DMF, 0.001 g/mL, 2 mL), and EG/DTT/DMF (0.1 g/mL EG and 0.001 g/mL DTT in 2 mL DMF) at 140°C in an oven. By weighting the dry sample at different time, the degradation kinetics were obtained.

## 2. Supplementary Figures

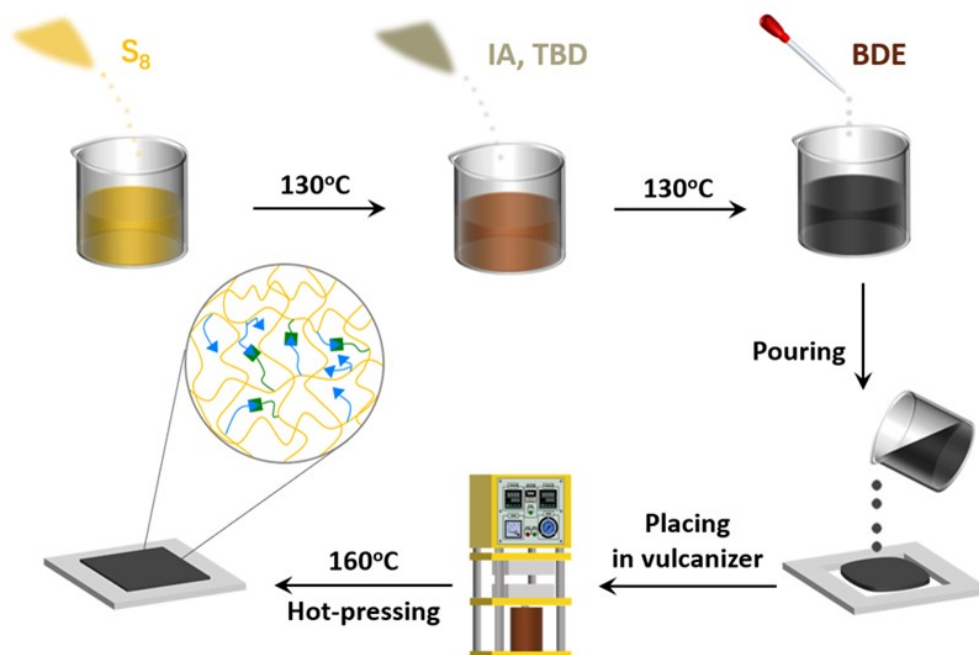

**Fig. S1** Schematic illustration of the preparation of the itaconic acid-based vitrimers from S<sub>8</sub>, IA, TBD and BDE through one-pot method.

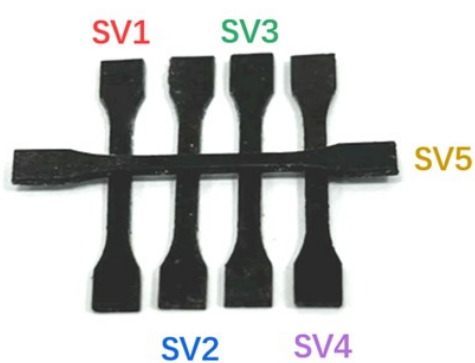

**Fig. S2** Photograph of the as-prepared itaconic acid-based vitrimers (SV1 to SV5).

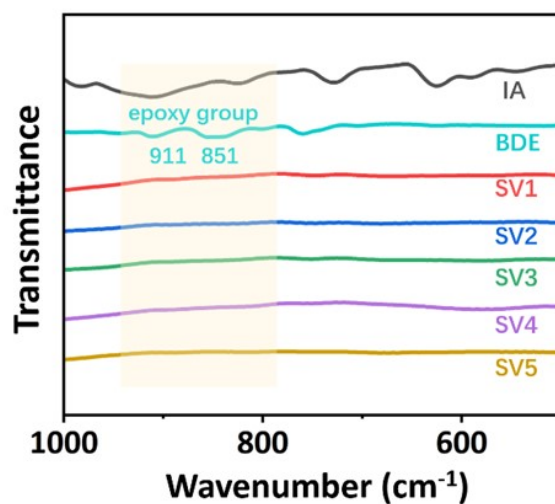

**Fig. S3** FTIR spectra of IA, BDE, and itaconic acid-based vitrimers (SV1 to SV5) in the range of 500-1000  $\text{cm}^{-1}$ . The signals at 905/853  $\text{cm}^{-1}$  were assigned to epoxy groups from BDE.

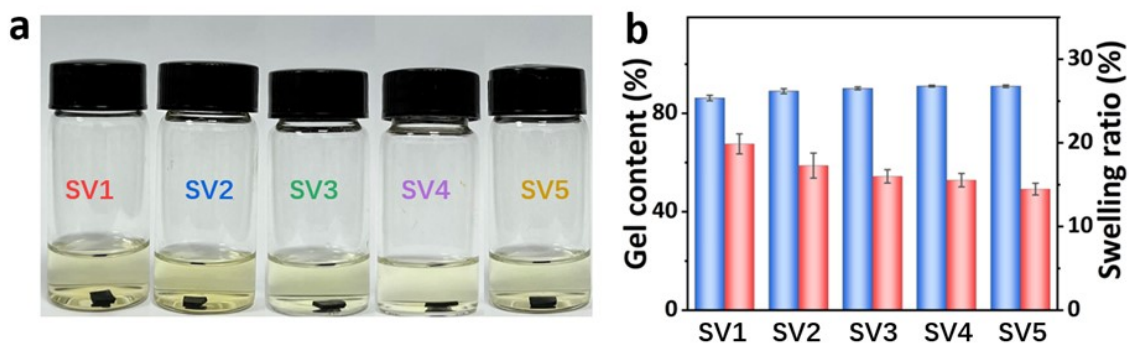

**Fig. S4** (a) Digital photos of itaconic acid-based vitrimers (SV1 to SV5) after soaking in acetone for 20 h. (b) The bar graph of gel content and swelling ratio of SV1 to SV5.

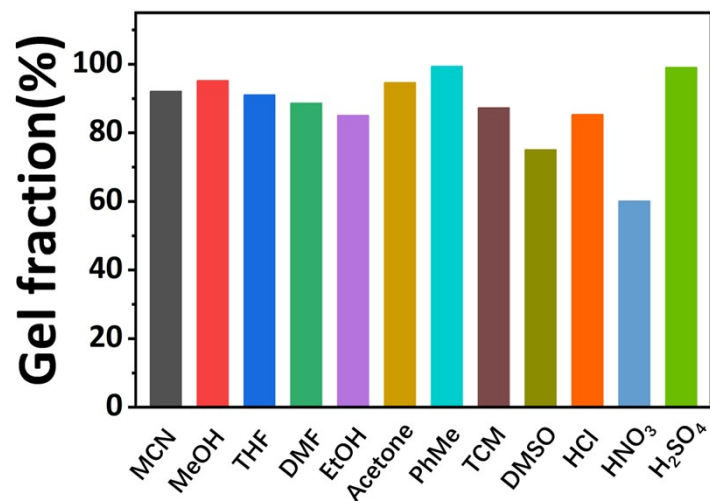

**Fig. S5** Gel fraction of SV5 after soaking in 12 different solvents for 7 days.

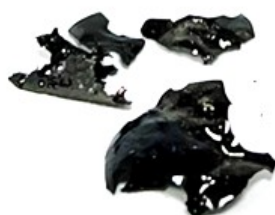

**Fig. S6** Digital photos of the polysulfides without addition of BDE (Poly(S-IA)).

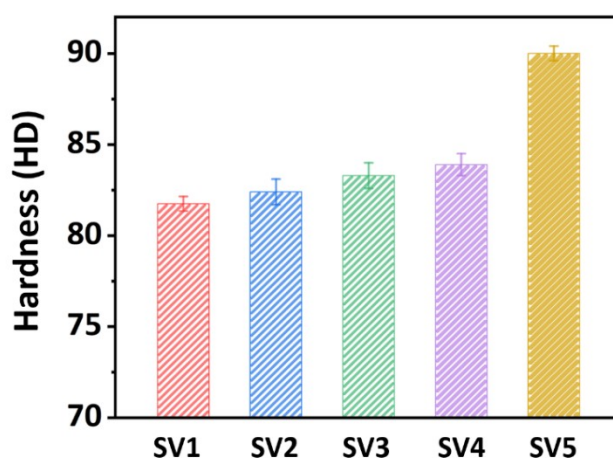

**Fig. S7** Hardness of the itaconic acid-based vitrimers (SV1 to SV5)

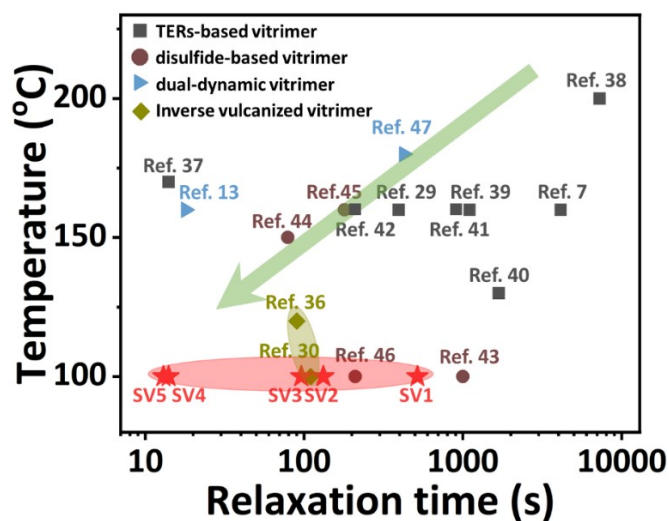

**Fig. S8** Comparison of stress relaxation time between this work and other reported polysulfides and biobased vitrimers.

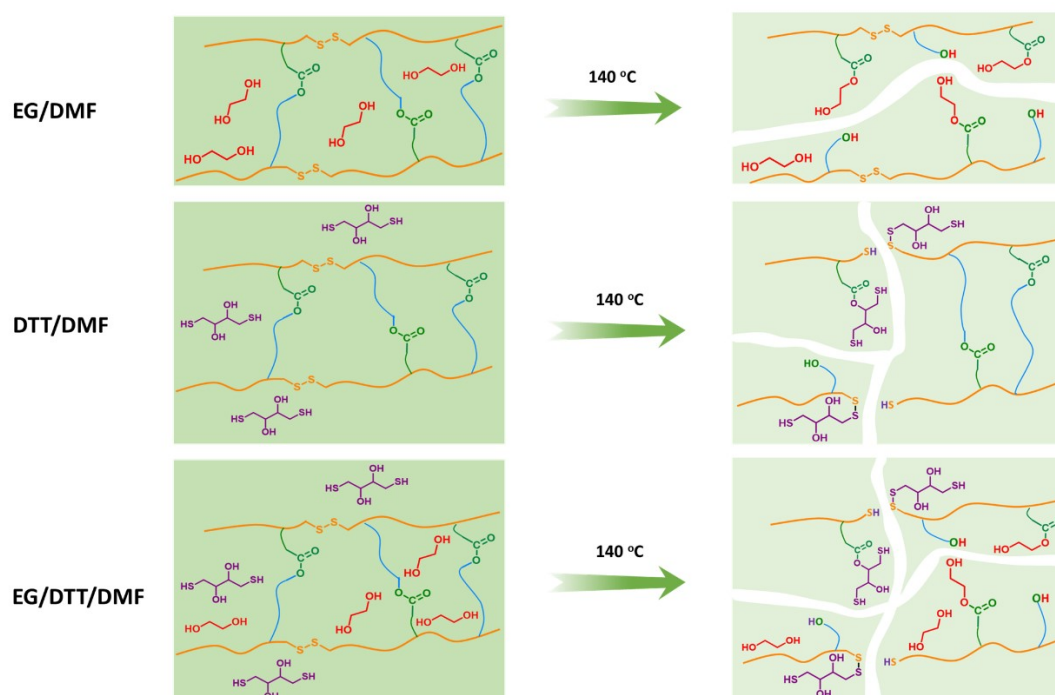

**Fig. S9** The proposed degradation mechanism of SV5 in ethylene glycol/dimethylformamide (EG/DMF), dithiothreitol/dimethylformamide (DTT/DMF), and EG/DTT/DMF at 140°C.



### 3. Supplemtray Tables

**Table S1** Gel contents of SV1-SV5 and other reported biobased vitrimers/cross-linked polysulfides.

| Entry     | Sample                                                           | Solvent                   | Gel content (%) | Reference        |
|-----------|------------------------------------------------------------------|---------------------------|-----------------|------------------|
| 1         | Biobased vitrimers<br>Oz-L/Se-EP                                 | Ethanol/acetone<br>(1:1)  | 83-90           | [6]              |
| 2         | Biobased vitrimers<br>ESO/GL                                     | Acetonitrile              | 89-91           | [7]              |
| 3         | Biobased vitrimers<br>CO/IPDI/IPI                                | DMF                       | 97-99           | [12]             |
| 4         | Biobased vitrimers<br>IA/TMP/DGEBA                               | Tetrahydrofuran           | 96-100          | [19]             |
| 5         | Biobased vitrimers<br>DGEAC/SA/GL                                | Dichloromethane           | 90-99           | [29]             |
| 6         | Polysulfide polymers<br>S <sub>8</sub> /DIB                      | DMF                       | 80              | [25]             |
| 7         | Polysulfide vitrimers<br>S8/Span-80/BADGE                        | Tetrahydrofuran           | 64-84           | [30]             |
| 8         | Polysulfide polymers<br>S <sub>8</sub> /MA-St                    | Toluene and<br>chloroform | 78, 81          | [31]             |
| 9         | Polysulfide polymers<br>S <sub>8</sub> /Castor oil               | Chloroform                | 79              | [32]             |
| 10        | Polysulfide polymers<br>S <sub>8</sub> /Soybean oil/Biochar      | Acetone                   | 87              | [33]             |
| <b>11</b> | <b>Itaconic acid-based<br/>polysulfide vitrimers<br/>SV1-SV5</b> | <b>Acetone</b>            | <b>86-91</b>    | <b>This work</b> |

**Table S2** Relaxation time of SV1-SV5 and other reported polysulfide, biobased vitrimers, traditional TERs-based vitrimers and traditional disulfide-based vitrimers.

| Entry | Sample                                                                                 | Dynamic bond                   | Catalyst             | Relaxation time (s)                                                                                                | Reference        |
|-------|----------------------------------------------------------------------------------------|--------------------------------|----------------------|--------------------------------------------------------------------------------------------------------------------|------------------|
| 1     | Polysulfide vitrimer S8/Span-80/MDI (S-Span-MDI-1)                                     | Multi-sulfide                  | Zn(DTC) <sub>2</sub> | 90 s (160°C)                                                                                                       | [36]             |
| 2     | Polysulfide vitrimer S8/Span-80/BADGE (BA75)                                           | Multi-sulfide                  | None                 | 110 s (110°C)                                                                                                      | [30]             |
| 3     | Biobased vitrimer ESO/GL (R = 0.5)                                                     | Ester                          | TBD                  | 4118 s (160°C)                                                                                                     | [7]              |
| 4     | Biobased vitrimer DGEAC/SA/GL (V4)                                                     | Ester                          | None                 | 394 s (160°C)                                                                                                      | [29]             |
| 5     | Biobased vitrimer FEP/CA/FEHBP                                                         | Ester                          | None                 | 50 s (140°C)                                                                                                       | [37]             |
| 6     | Biobased vitrimer CPA/ESO (R = 1.25)                                                   | Ester                          | TBD                  | 7245 s (200°C)                                                                                                     | [38]             |
| 7     | Biobased vitrimer LAE/GLU                                                              | Ester                          | None                 | 1100 s (160°C)                                                                                                     | [39]             |
| 8     | TERs-based vitrimer                                                                    | Ester                          | None                 | 1680 s (130°C)                                                                                                     | [40]             |
| 9     | TERs-based vitrimer PE-COOH/BDE (CL-PE-720)                                            | Ester                          | Zn(OAc) <sub>2</sub> | 120 s (180°C)                                                                                                      | [41]             |
| 10    | TERs-based vitrimer PE-COOH/BDE (CL-PE-1)                                              | Ester                          | Zn(OAc) <sub>2</sub> | 900 s (160°C)                                                                                                      | [42]             |
| 11    | Biobased vitrimer ESO/APD (ESOV-24)                                                    | Disulfide                      | None                 | 356 s (120°C)                                                                                                      | [43]             |
| 12    | Disulfide-based vitrimer bCC/cystamine/TREN                                            | Disulfide                      | None                 | 111 s (120°C)                                                                                                      | [44]             |
| 13    | Disulfide-based vitrimer                                                               | Disulfide                      | None                 | 240 s (160°C)                                                                                                      | [45]             |
| 14    | Biobased vitrimers ESO/DAA/DTSA (ESO <sub>6</sub> -SS <sub>3</sub> -DAA <sub>3</sub> ) | Disulfide                      | None                 | 210 s (120°C)                                                                                                      | [46]             |
| 15    | Biobased vitrimer PA1010/CO/APD (PEAV-3)                                               | Disulfide and ester            | None                 | 2002 s (100°C)                                                                                                     | [13]             |
| 16    | Biobased vitrimers ESO/DA/SiO <sub>2</sub> (ESO/SiO <sub>2</sub> -3)                   | Disulfide and ester            | TBD                  | 898 s (170°C)                                                                                                      | [47]             |
| 17    | <b>Itaconic acid-based polysulfide vitrimers (SV1-SV5)</b>                             | <b>Multi-sulfide and ester</b> | <b>TBD</b>           | <b>516 s (SV1, 100°C)<br/>132 s (SV2, 100°C)<br/>96 s (SV3, 100°C)<br/>14 s (SV4, 100°C)<br/>13 s (SV5, 100°C)</b> | <b>This work</b> |

**Table S3** Tensile strength and elongation at break of SV1-SV5 and other polysulfides prepared by inverse vulcanization

| Entry | Sample                                                                                                                                           | Vitrimer or not | Tensile strength (MPa) | Elongation at break (%) | Reference |
|-------|--------------------------------------------------------------------------------------------------------------------------------------------------|-----------------|------------------------|-------------------------|-----------|
| 1     | S <sub>8</sub> /Span-80/BADGE (BA25, BA50, BA75, BA100)                                                                                          | ✓               | 0.48                   | 171                     | [30]      |
|       |                                                                                                                                                  |                 | 1.51                   | 215                     |           |
|       |                                                                                                                                                  |                 | 6.36                   | 167                     |           |
|       |                                                                                                                                                  |                 | 13                     | 113                     |           |
| 2     | S <sub>8</sub> /MA-St                                                                                                                            | ✗               | 0.5                    | 2                       | [31]      |
| 3     | S <sub>8</sub> /Span-80/MDI (S-Span-MDI-4, 3, 2, 1)                                                                                              | ✓               | 0.14                   | 35                      | [36]      |
|       |                                                                                                                                                  |                 | 0.59                   | 51.2                    |           |
|       |                                                                                                                                                  |                 | 1.88                   | 42                      |           |
|       |                                                                                                                                                  |                 | 9.64                   | 16                      |           |
| 4     | S <sub>8</sub> /lignin (LS <sub>80</sub> , LS <sub>85</sub> , LS <sub>90</sub> )                                                                 | ✗               | 2                      | 0.2                     | [48]      |
|       |                                                                                                                                                  |                 | 1.5                    | 0.2                     |           |
|       |                                                                                                                                                  |                 | 0.6                    | 0.01                    |           |
| 5     | S <sub>8</sub> /fatty acids (ZPLS90, ZPLS95)                                                                                                     | ✗               | 2                      | 5                       | [49]      |
|       |                                                                                                                                                  |                 | 1.8                    | 23                      |           |
| 6     | S <sub>8</sub> /oleic acid/pozzolan cements                                                                                                      | ✗               | 2.5                    | 23                      | [50]      |
| 7     | S <sub>8</sub> /DA                                                                                                                               | ✗               | 0.5                    | 47.67                   | [51]      |
| 8     | S <sub>8</sub> /DVB/DIB (pS-DVB <sub>15</sub> , pS-DIB <sub>15</sub> )                                                                           | ✗               | 1.2                    | 40                      | [52]      |
|       |                                                                                                                                                  |                 | 0.8                    | 50                      |           |
| 9     | S <sub>8</sub> /DIB/TIB (poly(S-r-TIB <sub>30</sub> ), poly(S-r-TIB <sub>50</sub> ), poly(S-r-DIB <sub>30</sub> ), poly(S-r-DIB <sub>50</sub> )) | ✗               | 19.5                   | 1.63                    | [53]      |
|       |                                                                                                                                                  |                 | 9.43                   | 2.33                    |           |
|       |                                                                                                                                                  |                 | 10.1                   | 1.27                    |           |
|       |                                                                                                                                                  |                 | 2.33                   | 228                     |           |
| 10    | S <sub>8</sub> /DIB (poly(S-r-DIB <sub>50</sub> ))                                                                                               | ✗               | 18                     | 2                       | [54]      |
|       |                                                                                                                                                  |                 | 12.5                   | 10                      |           |
| 11    | S <sub>8</sub> /DCPD                                                                                                                             | ✗               | 6                      | 0.1                     | [55]      |
| 12    | S <sub>8</sub> /L-tyrosine                                                                                                                       | ✗               | 6                      | 0.9                     | [56]      |
| 13    | S <sub>8</sub> /squalene/β-myrcene (R=5:4:1, 5:3:2)                                                                                              | ✗               | 1.3                    | 280                     | [57]      |
|       |                                                                                                                                                  |                 | 0.4                    | 330                     |           |
| 14    | Itaconic acid-based polysulfide vitrimers (SV1-SV5)                                                                                              | ✓               | <b>0.68</b>            | <b>21</b>               | This work |
|       |                                                                                                                                                  |                 | <b>1.03</b>            | <b>22</b>               |           |
|       |                                                                                                                                                  |                 | <b>5.34</b>            | <b>59.38</b>            |           |
|       |                                                                                                                                                  |                 | <b>5.66</b>            | <b>55</b>               |           |
|       |                                                                                                                                                  |                 | <b>6.3</b>             | <b>49.77</b>            |           |
